# Supplementary material for: Bacteriophage T4 capsid as a nanocarrier for Peptide-N-Glycosidase F immobilization through self-assembly
Source: PubMed Central journal article supplement (PMC6424964; doi:10.1038/s41598-019-41378-9), 2019-03-19
Supplement: 41598_2019_41378_MOESM1_ESM.pdf [file 41598_2019_41378_MOESM1_ESM.pdf]

## Supplementary Information

# Bacteriophage T4 capsid as a nanocarrier for Peptide-N-Glycosidase F immobilization through self-assembly

Liang Zhang<sup>1,2,†</sup>, Pei Wang<sup>1,3,4,5,†</sup>, Chang Wang<sup>2</sup>, Yike Wu<sup>2</sup>,  
Xiaojun Feng<sup>2</sup>, He Huang<sup>4,6</sup>, Lujing Ren<sup>4,7</sup>, Bi-Feng Liu<sup>2</sup>, Song  
Gao<sup>1,3,4,\*</sup>, and Xin Liu<sup>2,\*</sup>

<sup>1</sup>Jiangsu Key Laboratory of Marine Bioresources and Environment, Huaihai Institute of Technology, Lianyungang 222005, China

<sup>2</sup>Britton Chance Center for Biomedical Photonics at Wuhan National Laboratory for Optoelectronics – Hubei Bioinformatics & Molecular Imaging Key Laboratory, Systems Biology Theme, Department of Biomedical Engineering, College of Life Science and Technology, Huazhong University of Science and Technology, Wuhan 430074, China

<sup>3</sup>Jiangsu Marine Resources Development Research Institute, Lianyungang 222005, China

<sup>4</sup>Co-Innovation Center of Jiangsu Marine Bio-industry Technology, Huaihai Institute of Technology, Lianyungang 222005, China

<sup>5</sup>Yugong Biolabs, Inc., Lianyungang 222000, China

<sup>6</sup>School of Pharmacy, Nanjing Tech University, Nanjing 211816, China

<sup>7</sup>College of Biotechnology and Pharmaceutical Engineering, Nanjing Tech University, Nanjing 211816, China

\*Correspondence and requests for materials should be addressed to S.G. (email: [gaosong@hhit.edu.cn](mailto:gaosong@hhit.edu.cn)) or X.L. (email: [xliu@mail.hust.edu.cn](mailto:xliu@mail.hust.edu.cn))

†These authors contributed equally to this work.

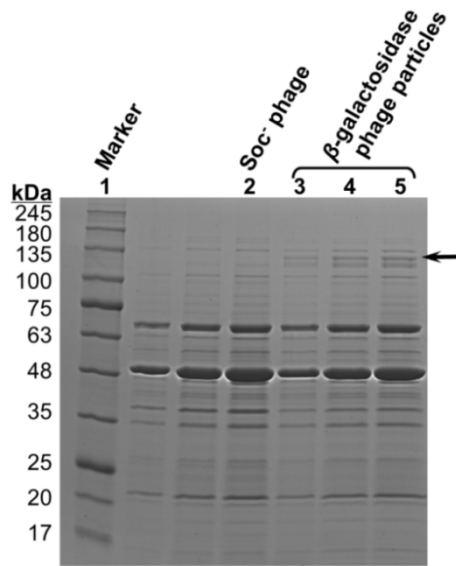

**Figure S1.**

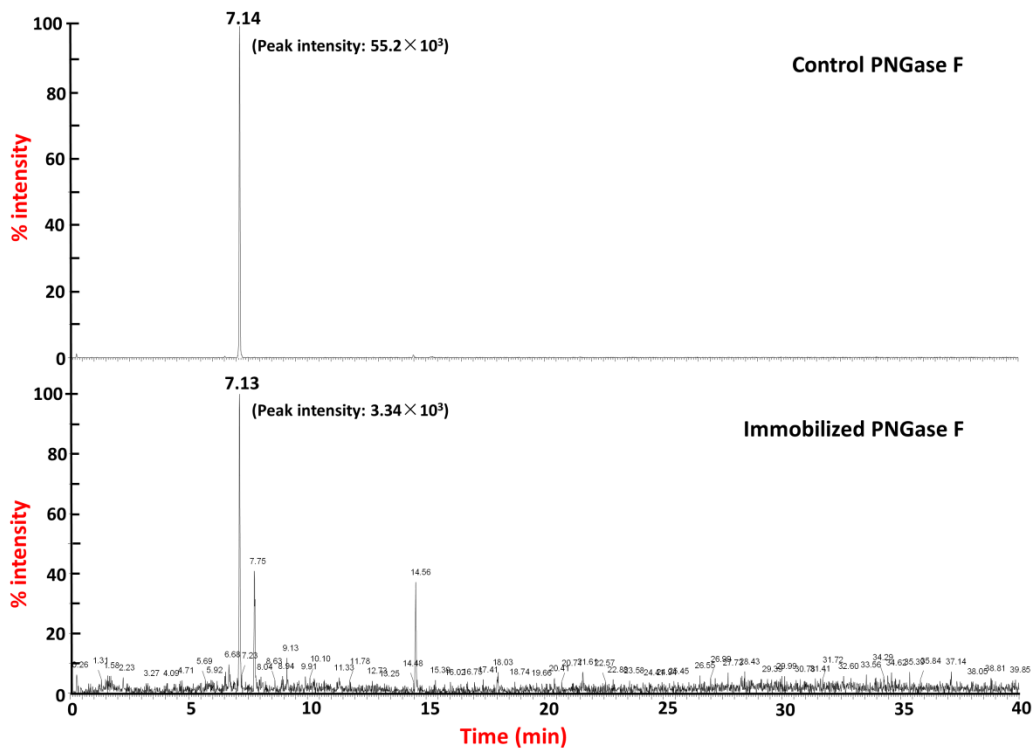

**Figure S2.** LC-MS data extracted for 511.73 ( $m/z$ ) peptides.

Signals of peptides with  $511.73 \pm 0.5$  ( $m/z$ ) (representing the peptide 4, refer to Tables S2 and S3 for  $m/z$  calculation) were extracted from the total ion chromatograms. Spectra of the extracted signals from the trypsin digested control PNGase F (top) and phage particles immobilized with PNGase F (bottom) are presented. Signals at the retention time of  $\sim 7.1$  min were identified as from the peptide 4. This is one representative figure of three replicates.

**Table S1.** Protein detected and sequence coverages

| Sample                  | Sequence coverage | Accession No.        | Name                                                            | Species | Peptides (95%) |
|-------------------------|-------------------|----------------------|-----------------------------------------------------------------|---------|----------------|
| <b>Control PNGase F</b> | 75.7%             | sp P21163 PNGF_ELIMR | Peptide-N(4)-(N-acetyl-beta-D-glucosaminy) asparagine amidase F | ELIMR   | 142            |
| <b>Phage particles</b>  | 44.9%             | sp P21163 PNGF_ELIMR | Peptide-N(4)-(N-acetyl-beta-D-glucosaminy) asparagine amidase F | ELIMR   | 10             |

**Table S2.** Peptides with highest contribution and confidence scores (Phage particle sample)

| No. | Contribution | Confidence | Sequence         | Precise molecular weight | z |
|-----|--------------|------------|------------------|--------------------------|---|
| 1   | 2            | 99         | AGWCPGMAVPTR     | 1301.623                 | 2 |
| 2   | 2            | 99         | NIQLPTNTEK       | 1156.607                 | 2 |
| 3   | 2            | 99         | SLLSGNTELK       | 1060.575                 | 2 |
| 4   | 2            | 99         | SSIDGVPYGK       | 1021.517                 | 2 |
| 5   | 2            | 99         | YANVYVK          | 855.4571                 | 2 |
| 6   | 2            | 99         | TCDEWDRYANVYVKNK | 2060.856                 | 2 |
| 7   | 2            | 99         | TEKAYLRTTISGWHAK | 1917.929                 | 4 |

**Table S3.** Peptides with highest contribution and confidence scores  
(Control PNGase F sample)

| No. | Contribution | Confidence | Sequence          | Precise molecular weight | z |
|-----|--------------|------------|-------------------|--------------------------|---|
| 1   | 2            | 99         | AGWCPCGMAVPTR     | 1301.598                 | 2 |
| 2   | 2            | 99         | NIQLPTNTEK        | 1156.589                 | 2 |
| 3   | 2            | 99         | SLLSGNTELK        | 1060.564                 | 2 |
| 4   | 2            | 99         | SSIDGVVPYGK       | 1021.507                 | 2 |
| 5   | 2            | 99         | YANVYVK           | 855.4483                 | 2 |
| 6   | 2            | 99         | ADNTVNIK          | 873.4775                 | 2 |
| 7   | 2            | 99         | AISSFVIK          | 934.55                   | 2 |
| 8   | 2            | 99         | FDIVYGTPDYK       | 1316.64                  | 2 |
| 9   | 2            | 99         | FITPYWVGTEK       | 1339.673                 | 2 |
| 10  | 2            | 99         | GCAEWCFR          | 1084.41                  | 2 |
| 11  | 2            | 99         | GLEIDVTDFK        | 1135.575                 | 2 |
| 12  | 2            | 99         | IQLPTNTEK         | 1042.566                 | 2 |
| 13  | 2            | 99         | IVYGTPDYK         | 1054.536                 | 2 |
| 14  | 2            | 99         | IYTETWLAK         | 1123.589                 | 2 |
| 15  | 2            | 99         | KNIQLPTNTEK       | 1284.706                 | 3 |
| 16  | 2            | 99         | NAFGDGLSQAEGT     | 1352.601                 | 2 |
| 17  | 2            | 99         | NAFGDGLSQAEGTF    | 1499.659                 | 2 |
| 18  | 2            | 99         | NKTTGEWYEIGR      | 1452.7                   | 3 |
| 19  | 2            | 99         | SIDGVVPYGK        | 934.4803                 | 2 |
| 20  | 2            | 99         | SNTPISAPVVT       | 1084.576                 | 2 |
| 21  | 2            | 99         | SNTPISAPVVTN      | 1198.627                 | 2 |
| 22  | 2            | 99         | SSIDGVVPY         | 836.3905                 | 2 |
| 23  | 2            | 99         | SVDFDIVYGTPDYK    | 1617.77                  | 2 |
| 24  | 2            | 99         | TCDEWDR           | 980.3639                 | 2 |
| 25  | 2            | 99         | TFQHQLGALGC       | 1230.586                 | 2 |
| 26  | 2            | 99         | TTGEWYEIGR        | 1210.549                 | 2 |
| 27  | 2            | 99         | TTISGWGH          | 857.4033                 | 2 |
| 28  | 2            | 99         | TTISGWGHAK        | 1056.535                 | 2 |
| 29  | 2            | 99         | TTISGWGHAKPYDAGSR | 1802.875                 | 4 |
| 30  | 2            | 99         | YAISSFVIK         | 1097.609                 | 2 |
